# Supplementary material
Source: publisher figshare collection journal article supplement (https://acs.figshare.com/ndownloader/files/4371856)
Supplement: Supplementary file 1 [file 4371856]

Supporting information

## **Current production by bacterial communities enriched from wastewater sludge with different electron donors**

Jinjun Kan <sup>†</sup>, Lewis Hsu <sup>‡</sup>, Andrea C.M. Cheung <sup>†</sup>, Massoud Pirbazari <sup>‡</sup>, and Kenneth H.

Nealson <sup>†\*</sup>

The supporting materials are available free of charge via the Internet at

<http://pubs.acs.org>, which includes supplementary Table 1-2, and Figure S1-S5:

Supplementary Table 1. Current and power densities generated from MFCs fed with different carbon sources, and estimated heat of formation values and percentage conversion to electrical energy.

Supplementary Table 2. Characterization of DGGE bands excised from bacterial community fingerprints (Figure 2A).

Supplementary Figure S1. Side and front view of dual-compartment fuel cell used in the current study (modified from Bretschger et al. 2007). Two pieces of graphite felts (surface area  $\sim 7.6 \text{ cm}^2$ ) were attached to Nafion membrane in anode compartments.

Supplementary Figure S2. Current productions responding to carbon source consumption (HPLC). Fluctuations in volume and thus organic acid concentration were due to evaporation. Arrows indicated when corresponding carbon sources were injected.

1

2   Supplementary Figure S3. SEM images showing bacterial biofilms attached on carbon  
3   fibers at anode compartment. No.1, MR-1; No. 2-7, enriched bacterial assemblages with  
4   lactate, succinate, NAG, acetate, formate and uridine respectively. Images labeled **b** were  
5   a higher magnification image of the highlighted area in images labeled **a**.

6

7   Supplementary Figure S4. Reduction of HFO (A) and Fe-citrate (B), and current  
8   production (C) by new isolated *Shewanella* sp. MFC 2, 6, and 14. Arrows indicated when  
9   carbon sources were injected.

10

11   Supplementary Figure S5. Color version for Figure 1, showing the current production  
12   measured from two independent anode electrodes as shown in Supplementary Figure S1.

Supplementary Table 1. Current and power densities generated from MFCs fed with different carbon sources, and estimated heat of formation values and percentage conversion to electrical energy.

| MFC No. | Inoculums | Carbon source | Max. current density resulting from injection of carbon source @ 2 mM ( $\mu\text{A}/\text{cm}^2$ ) | Max. power density based on linear polarization sweep ( $\text{mW}/\text{m}^2$ ) | Estimated heat of formation, $\Delta H^\circ_f$ (kcal / mol) | Max. electrical energy from carbon source injection @ 2mM (kcal / mol) | conversion % |
|---------|-----------|---------------|-----------------------------------------------------------------------------------------------------|----------------------------------------------------------------------------------|--------------------------------------------------------------|------------------------------------------------------------------------|--------------|
| 1       | MR1       | lactate       | 8.9                                                                                                 | 13.0                                                                             | -136.3                                                       | 0.072                                                                  | 0.053        |
| 2       | sludge    | lactate       | 68.9                                                                                                | 107.3                                                                            | -136.3                                                       | 1.049                                                                  | 0.770        |
| 3       | sludge    | succinate     | 100.5                                                                                               | 67.2                                                                             | -180.0                                                       | 1.387                                                                  | 0.771        |
| 4       | sludge    | NAG           | 127.9                                                                                               | 149.7                                                                            | -232.3                                                       | 2.363                                                                  | 1.017        |
| 5       | sludge    | acetate       | 193.5                                                                                               | 221.1                                                                            | -95.4                                                        | 2.494                                                                  | 2.614        |
| 6       | sludge    | formate       | 39.9                                                                                                | 98.0                                                                             | -90.7                                                        | 0.137                                                                  | 0.151        |
| 7       | sludge    | uridine       | 62.0                                                                                                | 233.5                                                                            | -92.4                                                        | 2.302                                                                  | 2.492        |

Supplementary Table 2. Characterization of DGGE bands excised from bacterial community fingerprints (Figure 2A).

| Band ID | Bacterial groups | Closely related sequence from GenBank | Accession No. | Identity (%) | Source                     |
|---------|------------------|---------------------------------------|---------------|--------------|----------------------------|
| a1, p13 | Beta             | <i>Azovibrio</i> sp. R-25062          | AM084040      | 98           | activated sludge           |
| a2      | Delta            | <i>Geobacter sulfurreducens</i>       | U13928        | 99           | surface sediments          |
|         |                  | Uncultured <i>Geobacter</i> sp.       | FJ262541      | 99           | single chamber MFCs        |
|         |                  | Uncultured DGGE band                  | EF506576      | 99           | two-chamber sludge MFCs    |
|         |                  | Uncultured bacterium MFC-GIST313      | EU704572      | 99           | butyrate-fed MFCs          |
| a3      | Beta             | <i>Azonexus caeni</i>                 | AB166882      | 98           | wastewater sludge          |
| a4, p11 | Alpha            | <i>Aquaspirillum</i> sp. AHL 4        | AY379976      | 99           | activated sludge           |
| a5, a9  | Delta            | Uncultured bacterium MFC-A            | FJ262566      | 100          | single-chamber MFCs        |
|         |                  | Uncultured bacterium MFC-G8           | FJ262546      | 100          | single-chamber MFCs        |
| a6, p1  | Beta             | Burkholderials bacterium TP243        | EF636173      | 100          | freshwaer pond sediments   |
| a7      | Beta             | Uncultured bacterium MFC-GIST321      | EU704559      | 98           | butyrate-fed MFCs          |
| a8      | Beta             | Uncultured bacterium MFC-GIST321      | EU704559      | 96           | butyrate-fed MFCs          |
| p2, p12 | Firmicutes       | Uncultured bacterium TANB18           | AY667253      | 99           | groundwater                |
| p3      | Firmicutes       | Uncultured bacterium 18-5             | AB425299      | 99           | biosolid waste             |
| p4      | Delta            | Uncultured bacterium MFC-A            | FJ262566      | 96           | single-chamber MFCs        |
| p5      | Beta             | <i>Aquitalea</i> sp. 5YN1-3           | EU594330      | 91           | Korean wetland             |
| p6, p14 | Beta             | <i>Ideonella</i> sp. O-1              | AB557644      | 89           | N/A                        |
|         |                  | Uncultured bacterium APS41            | FJ375503      | 89           | MFCs                       |
| p7      | Bacteroidetes    | Uncultured bacterium KD1-125          | AY218551      | 85           | gut of termites            |
| p8      | Bacteroidetes    | Uncultured bacterium                  | AY537432      | 99           | gut of zebrafish           |
| p9      | Bacteroidetes    | Uncultured DGGE band D17-14           | DQ906137      | 99           | swine lagoon slurry        |
| p10     | Beta             | Uncultured Rhodocyclaceae bacterium   | AM159316      | 93           | rice rhizosphere           |
| s1, s5  | Beta             | <i>Diaphorobacter</i> sp. Phe82       | AB489905      | 100          | cavity groundwater         |
|         |                  | Uncultured bacterium                  | AB286395      | 100          | activated sludge           |
| s2      | Bacteroidetes    | Uncultured bacterium Run-S64          | AB247474      | 100          | activated sludge           |
| s3, s7  | Gamma            | Uncultured bacterium                  | DQ201870      | 99           | wastewater treatment plant |
| s4      | Firmicutes       | <i>Clostridium</i> sp.                | FM865920      | 100          | environmental samples      |
| s6      | Gamma            | Uncultured bacterium                  | FJ535006      | 100          | activated sludge           |
|         |                  | Uncultured Xanthomonadales bacterium  | EU639124      | 100          | thermophilic MFCs          |

N/A: not available.



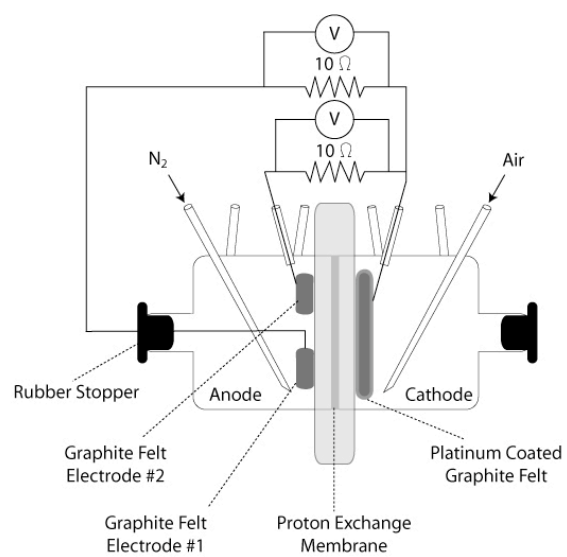

Side View

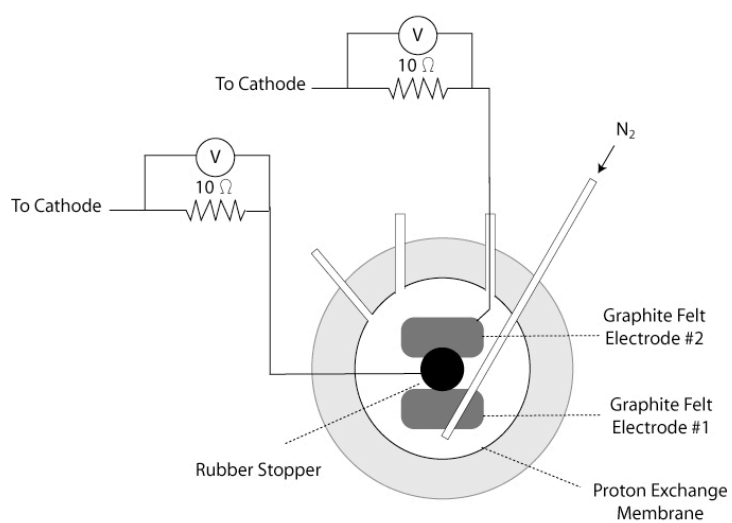

Front View

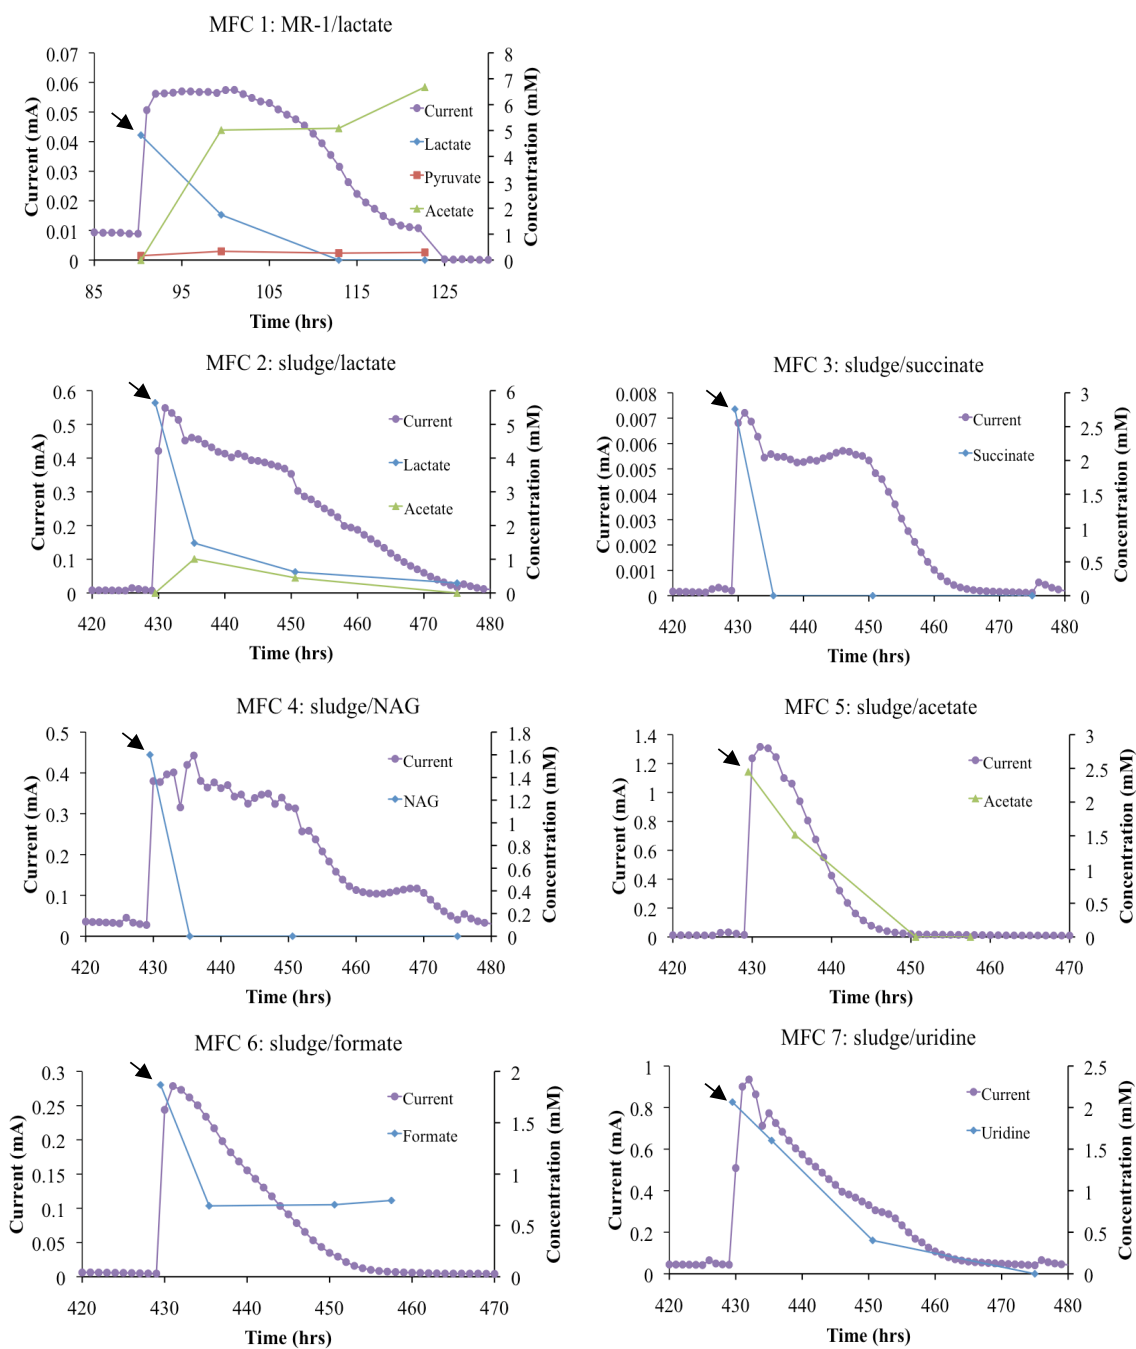

Supplementary Figure S2

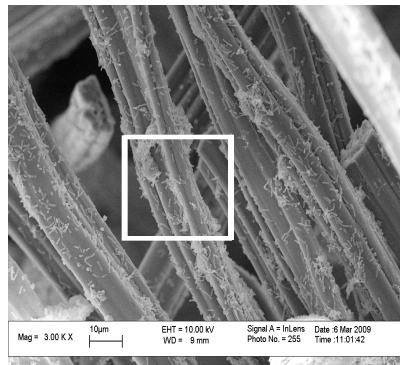

**1a**

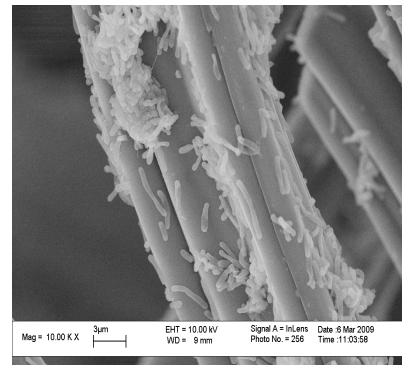

**1b**

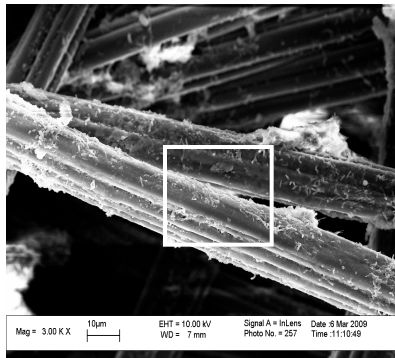

**2a**

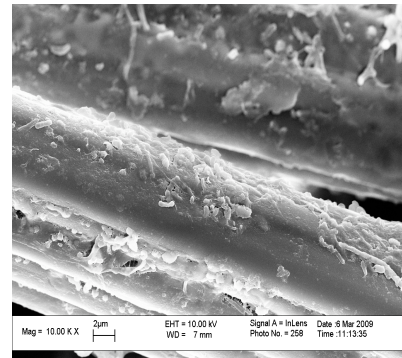

**2b**

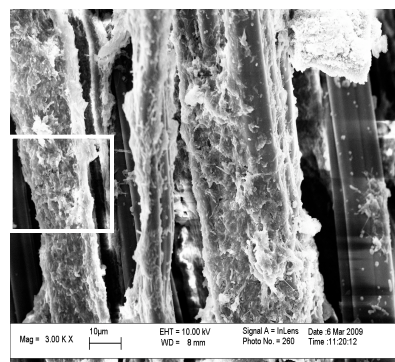

**3a**

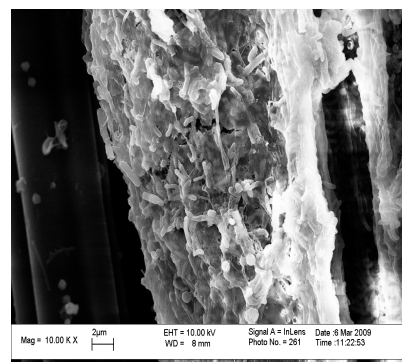

**3b**

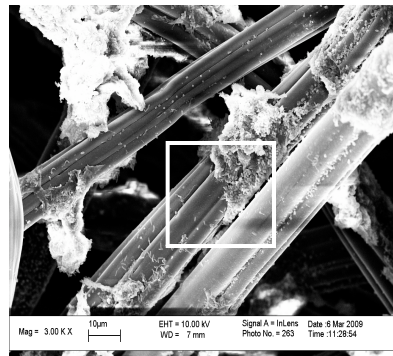

**4a**

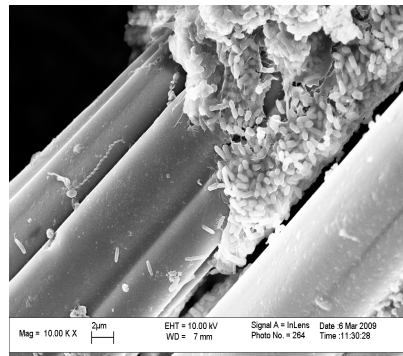

**4b**

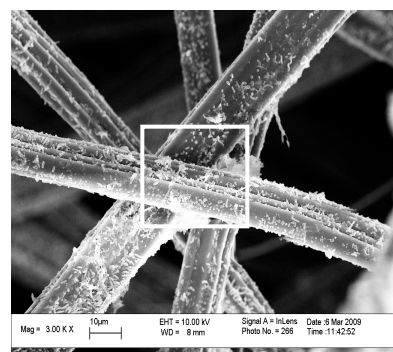

**5a**

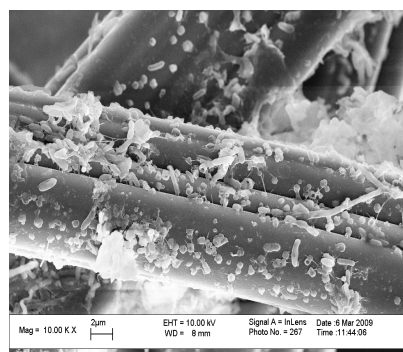

**5b**

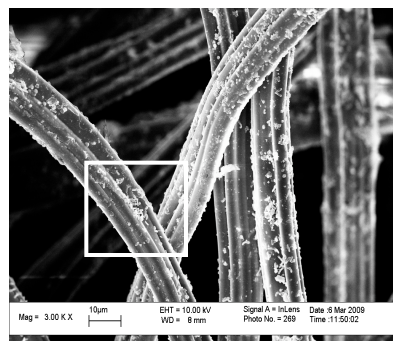

**6a**

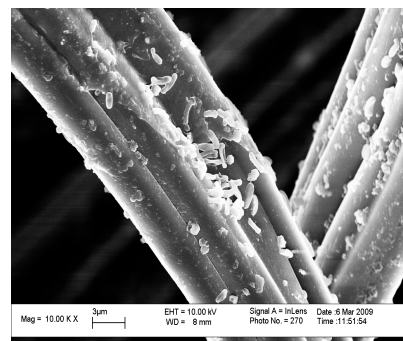

**6b**

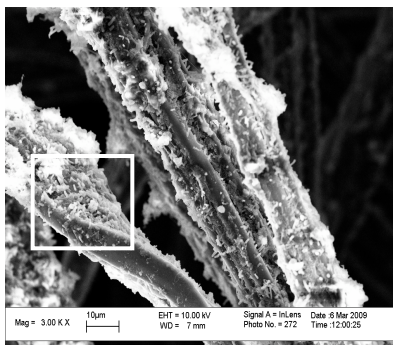

**7a**

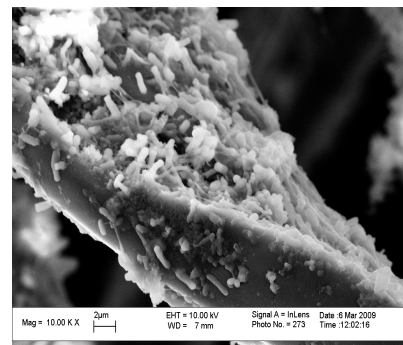

**7b**

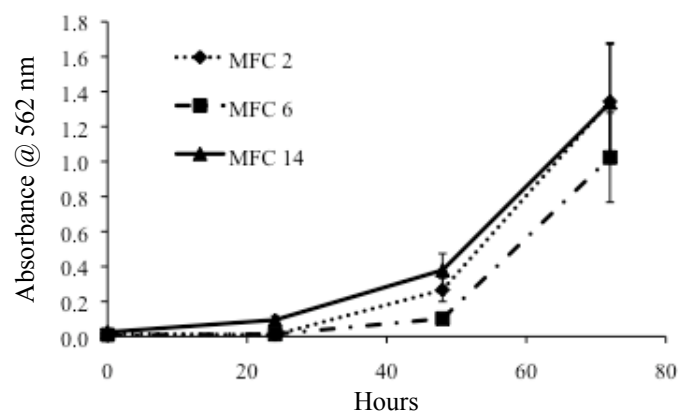

A

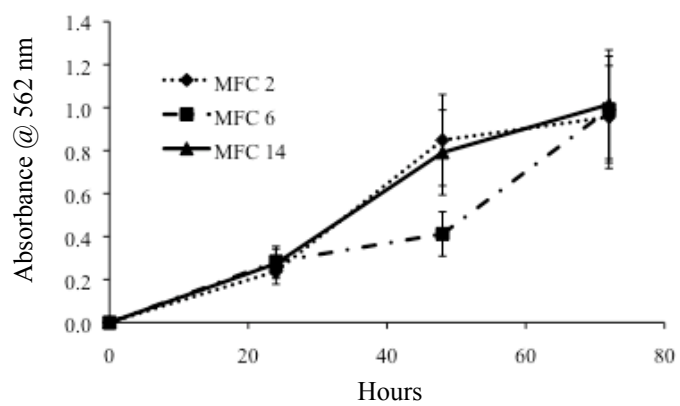

B

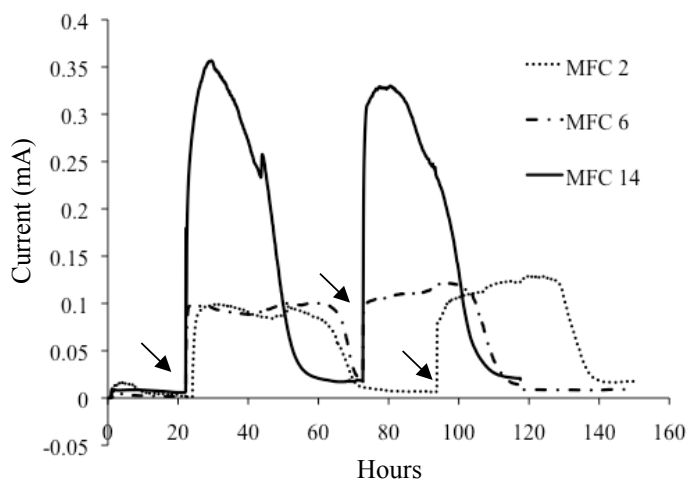

C



1. MR-1 - Fuel Cell

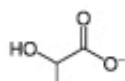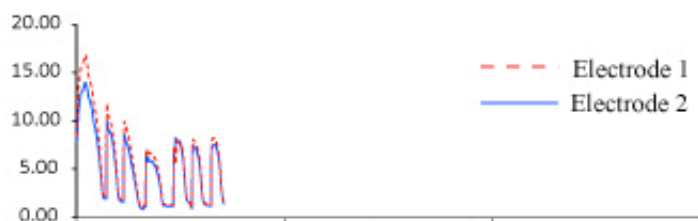

2. Sludge - lactate

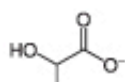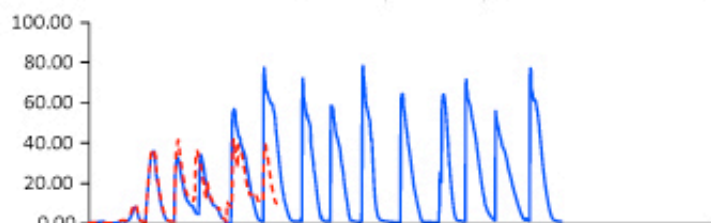

3. Sludge - succinate

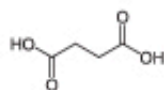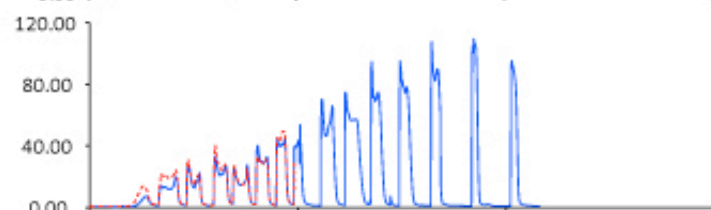

4. Sludge - NAG

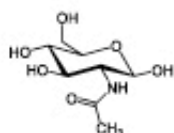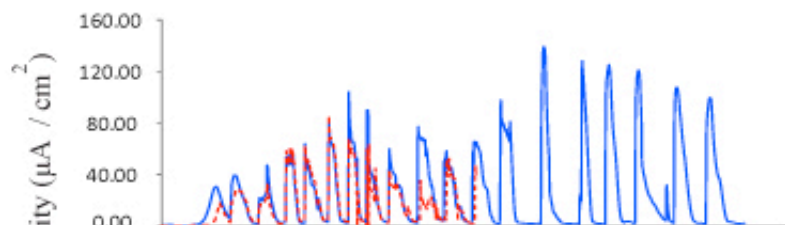

5. Sludge - acetate

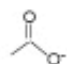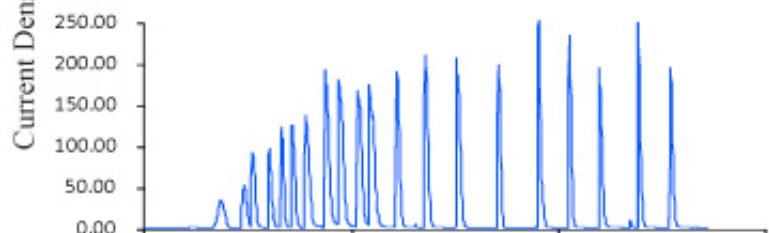

6. Sludge - formate

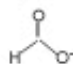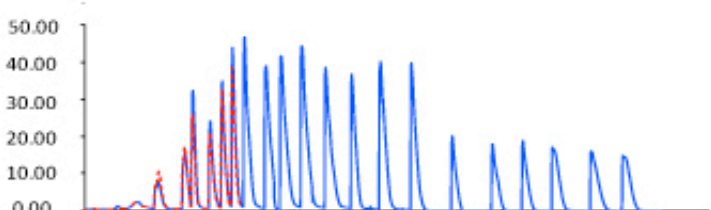

7. Sludge - uridine

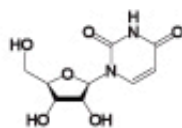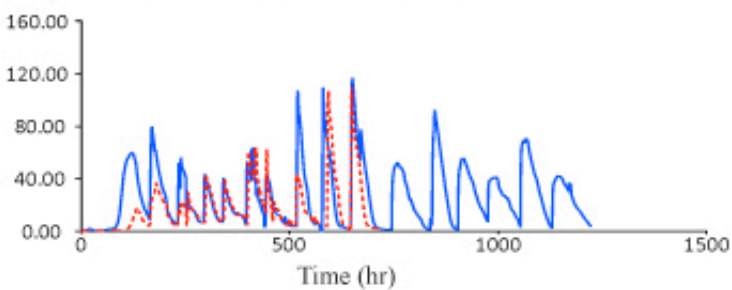

Supplementary Figure S5
